# Supplementary material for: Tripterygium wilfordii Glycosides Upregulate the New Anti‐Inflammatory Cytokine IL‐37 through ERK1/2 and p38 MAPK Signal Pathways
Source: Hindawi journal article supplement (doi:10.1155/2017/9148523), 2017-01-01
Supplement: f1 [file 9148523.f1.pdf]

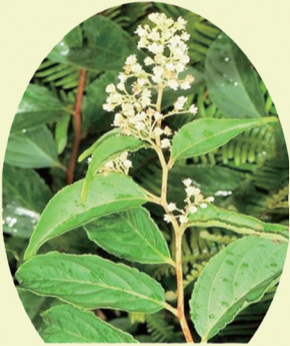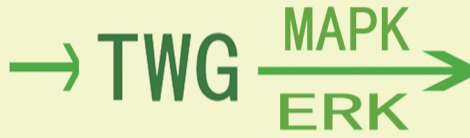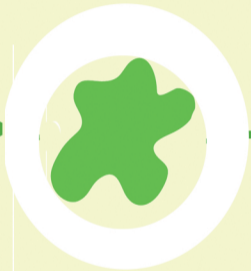

IL-37

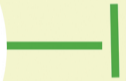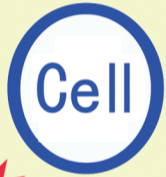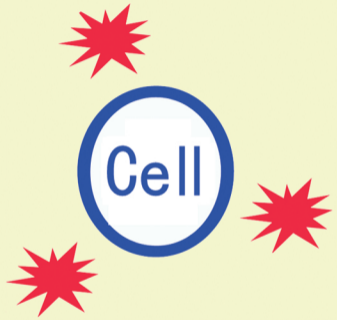

Inflammatory molecules
